# Supplementary material for: Influence of the Crc global regulator on substrate uptake rates and the distribution of metabolic fluxes in Pseudomonas putida KT2440 growing in a complete medium
Source: PubMed Central journal article supplement — Environ Microbiol. 2019 Oct 18;21(11):4446–59. doi: 10.1111/1462-2920.14812 (PMC6900033; doi:10.1111/1462-2920.14812), 2019-10-18
Supplement: EMI-21-4446-s007.pdf [file EMI-21-4446-s007.pdf]

## A. Flux model

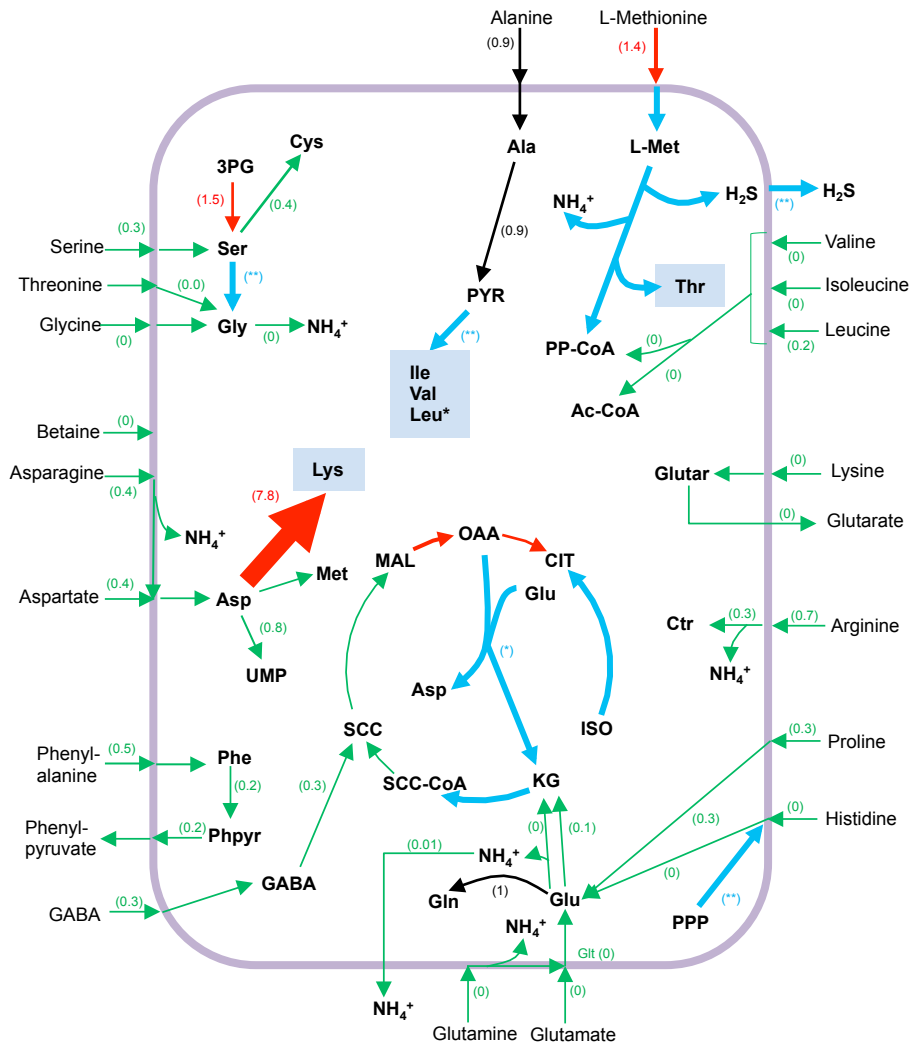

## B. Proteomics

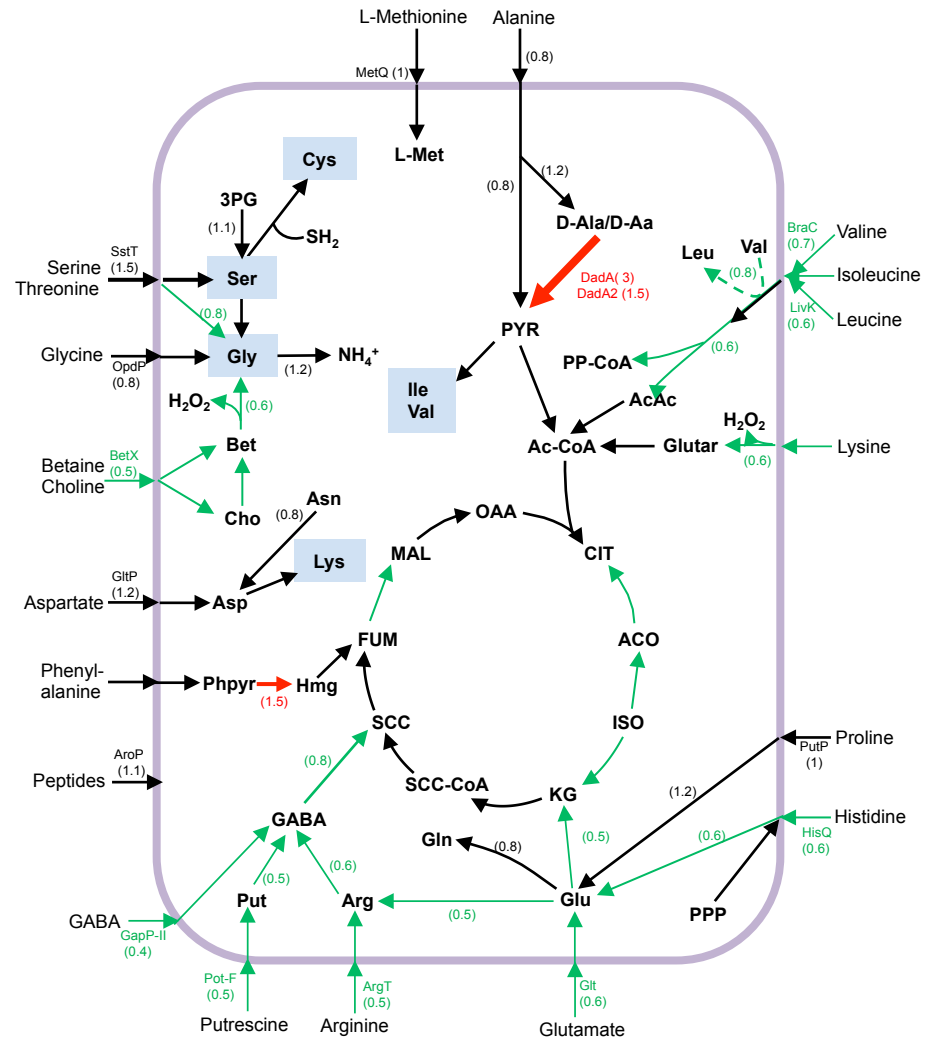

\*Only the last step of Leucine biosynthesis is upregulated, all other steps decrease

Metabolism of amino acids, Crc-null strain, mid phase vs. early phase
