# Supplementary figures and images for: Influence of the Crc global regulator on substrate uptake rates and the distribution of metabolic fluxes in Pseudomonas putida KT2440 growing in a complete medium
Source: PubMed Central journal article supplement — Environ Microbiol. 2019 Oct 18;21(11):4446–59. doi: 10.1111/1462-2920.14812 (PMC6900033; doi:10.1111/1462-2920.14812), 2019-10-18

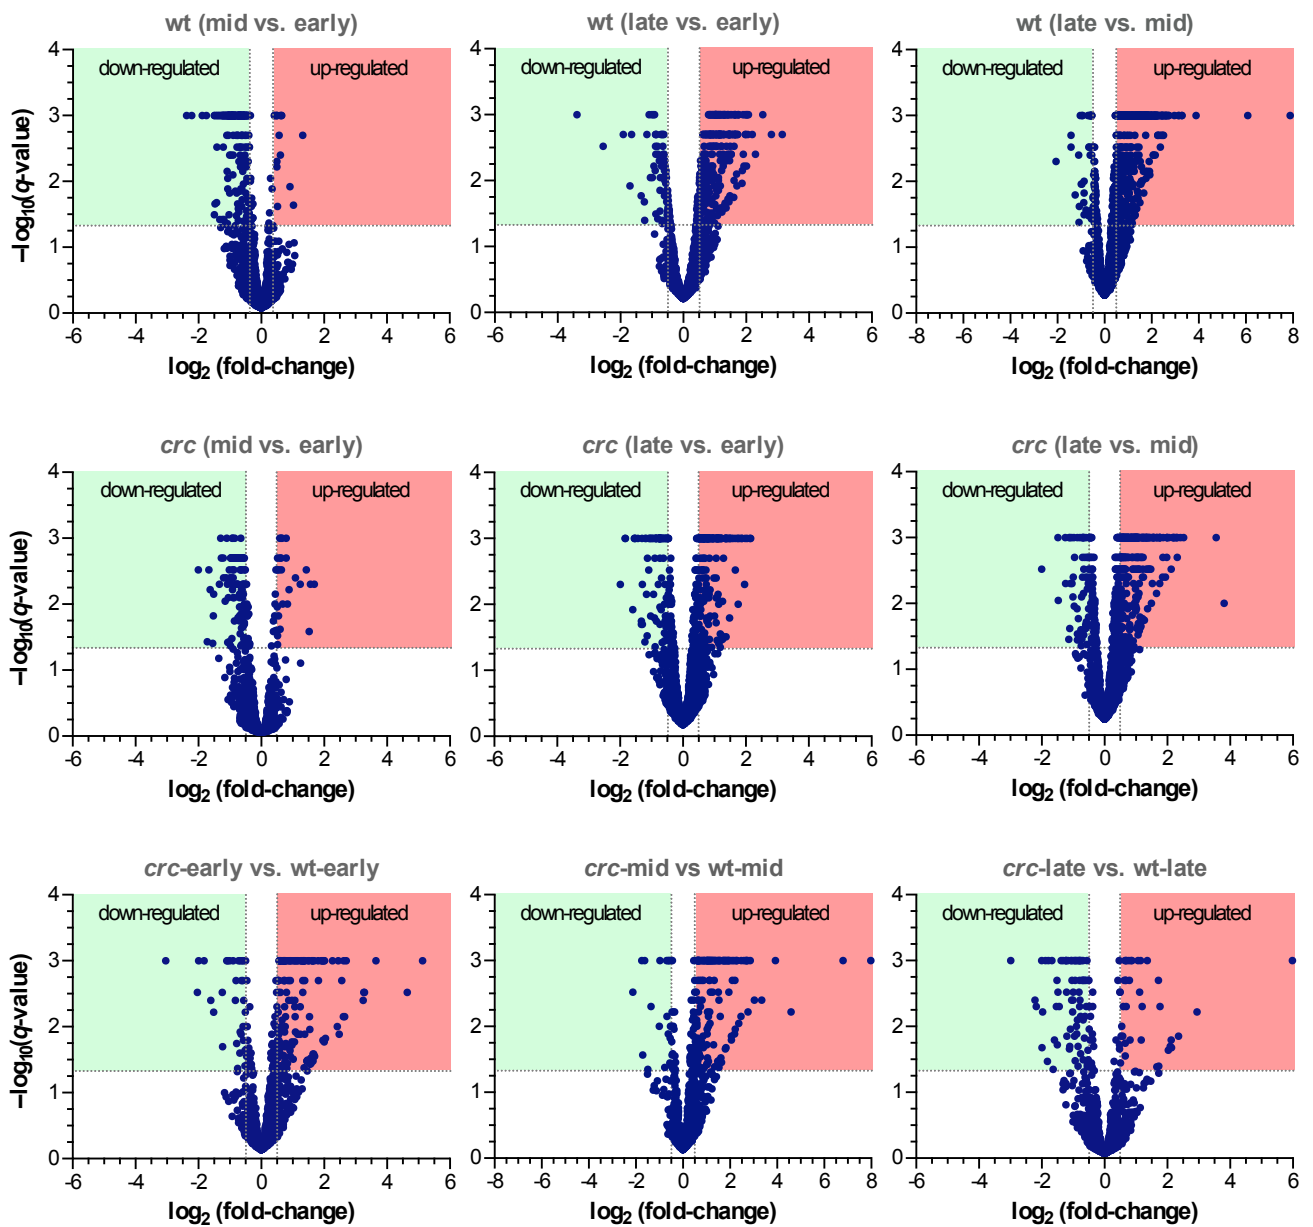

Supplement: EMI-21-4446-s001.pdf [file EMI-21-4446-s001.pdf]

## A. Sugars and organic acids

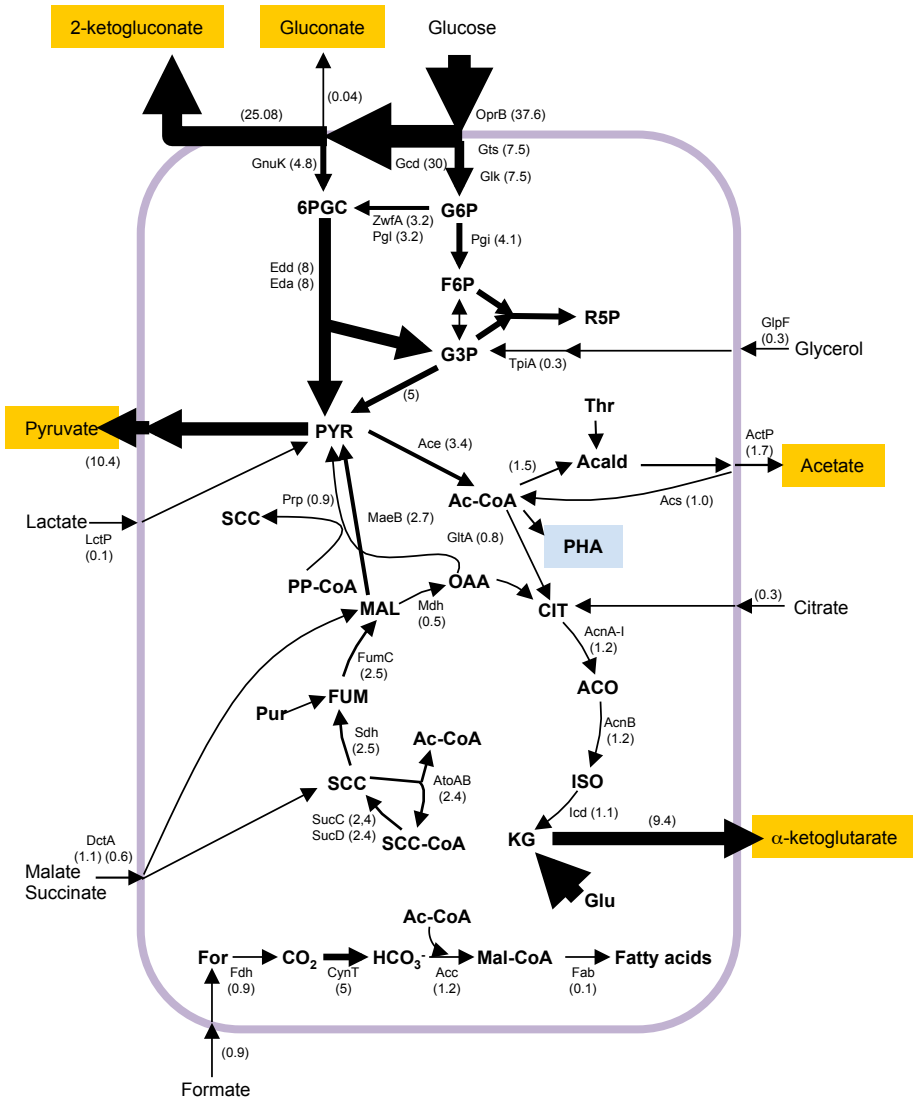

## B. Amino acids

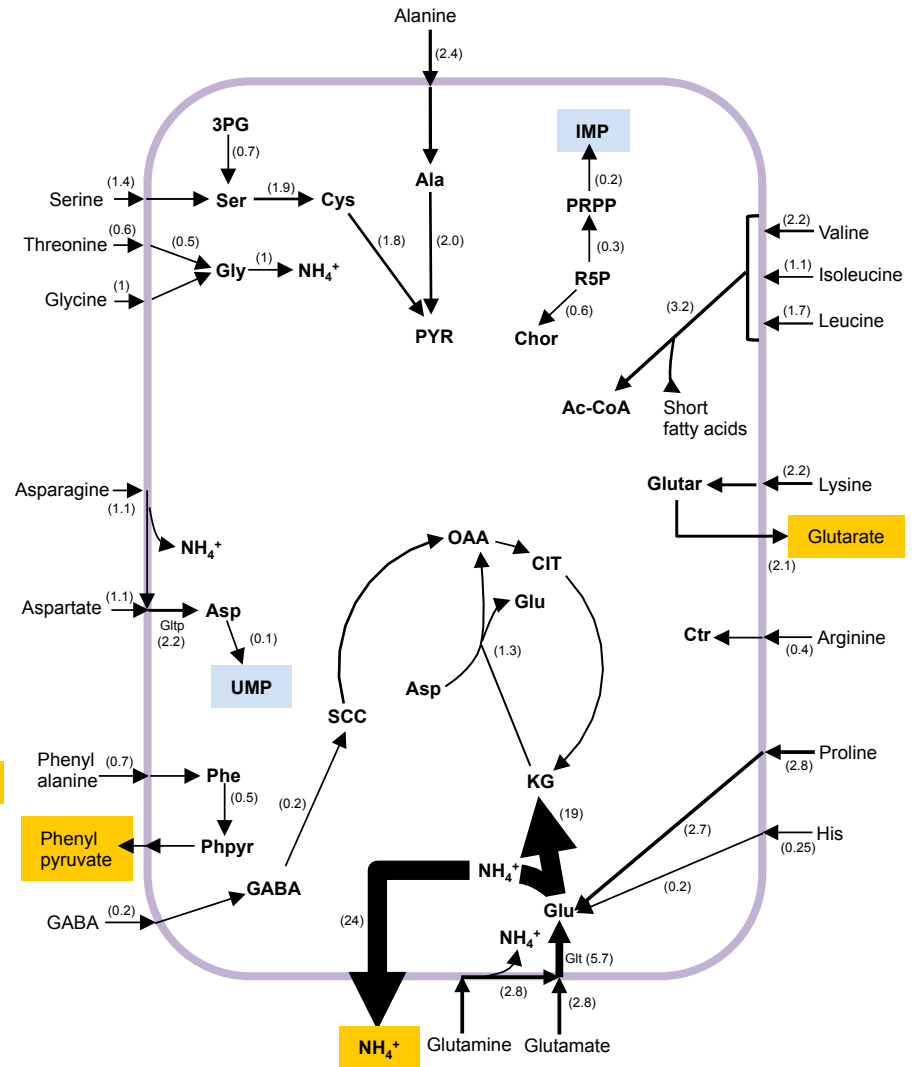

Central carbon & Aa metabolism, Crc-null, early phase

Supplement: EMI-21-4446-s003.pdf [file EMI-21-4446-s003.pdf]

## A. Flux model

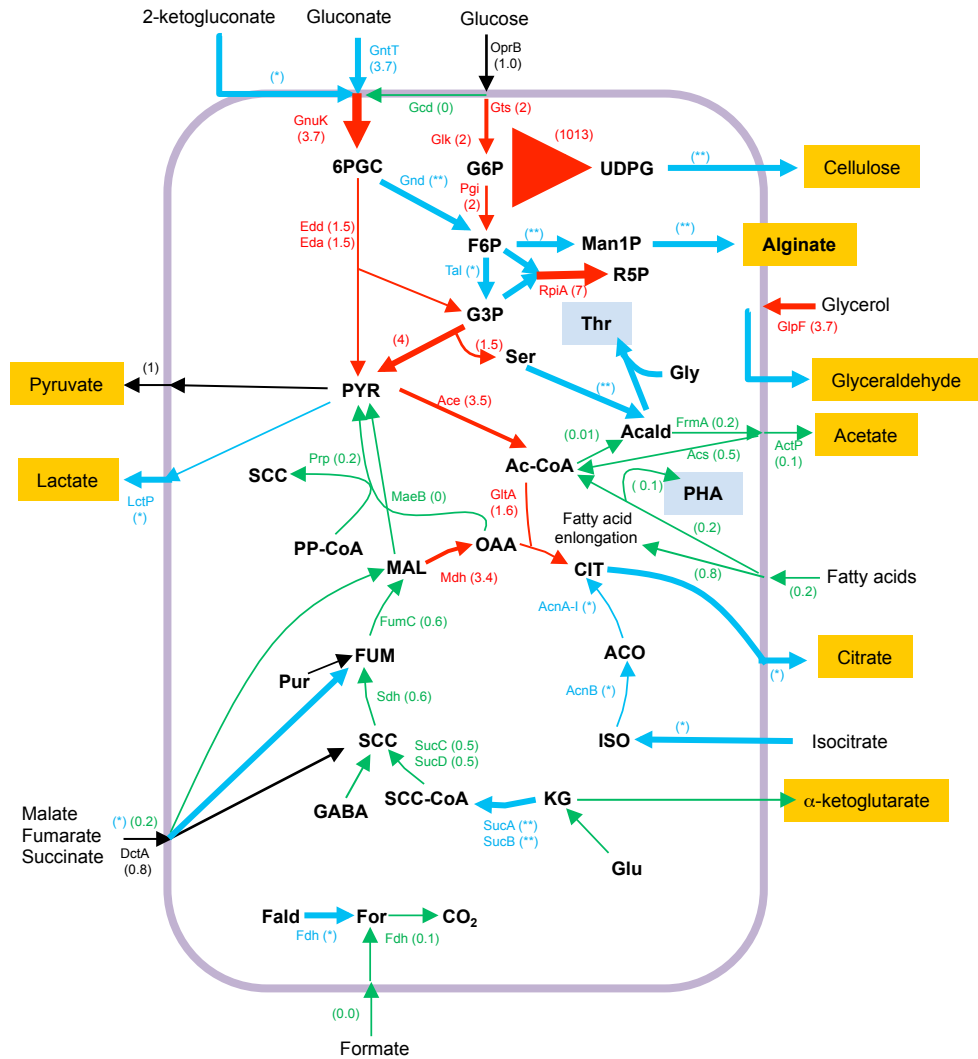

## B. Proteomics

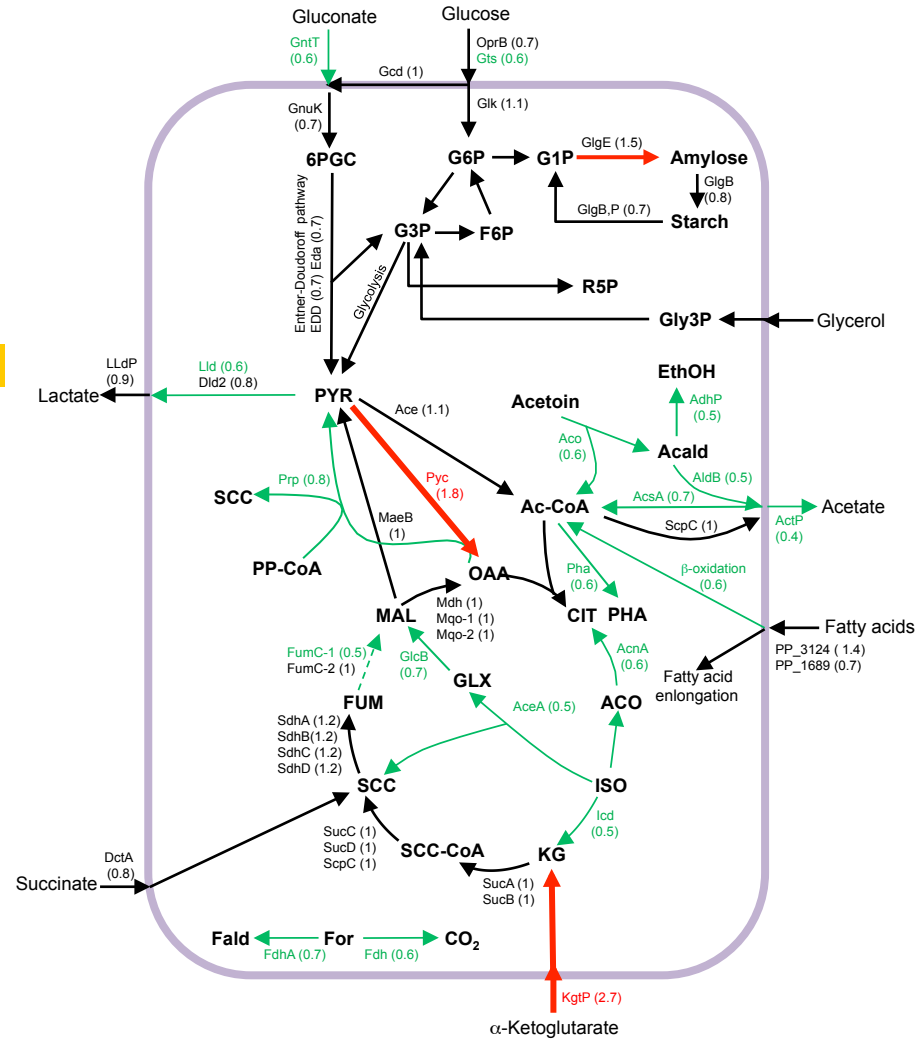

Central carbon metabolism, Crc-null strain, mid phase vs. early phase

Supplement: EMI-21-4446-s005.pdf [file EMI-21-4446-s005.pdf]

## A. Flux model

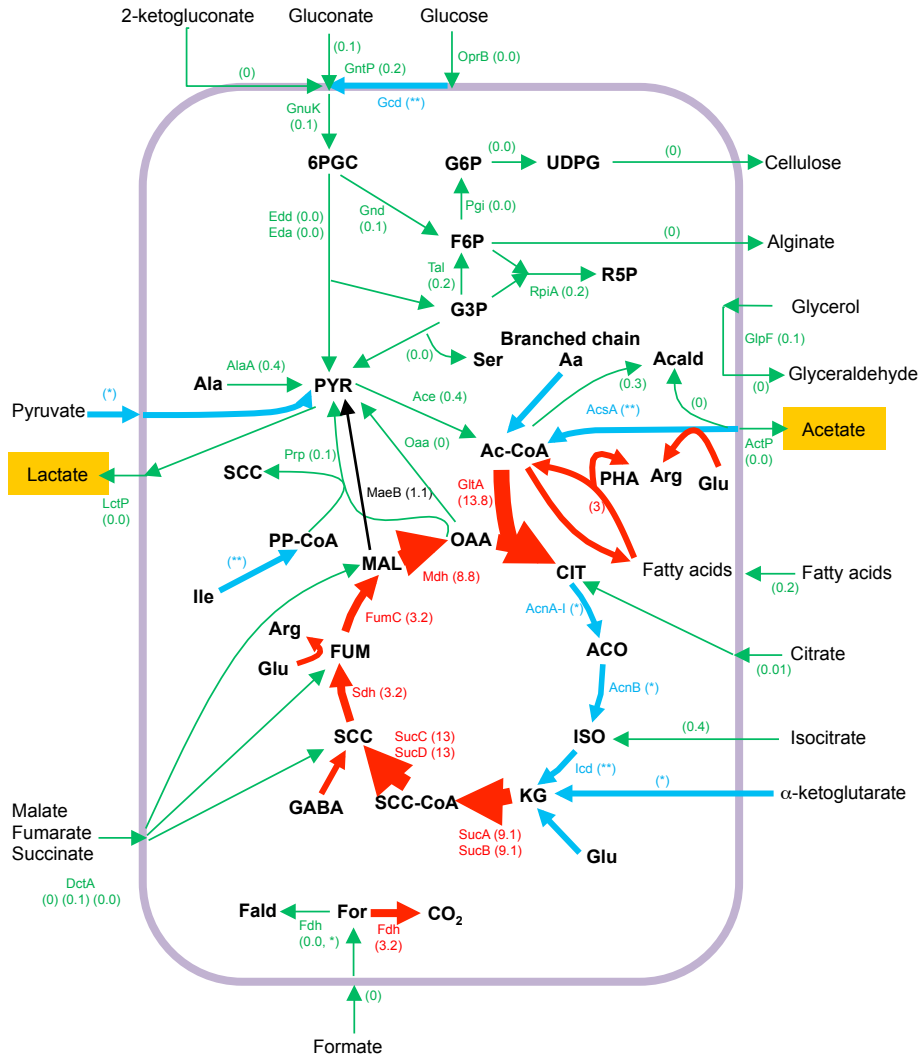

## B. Proteomics

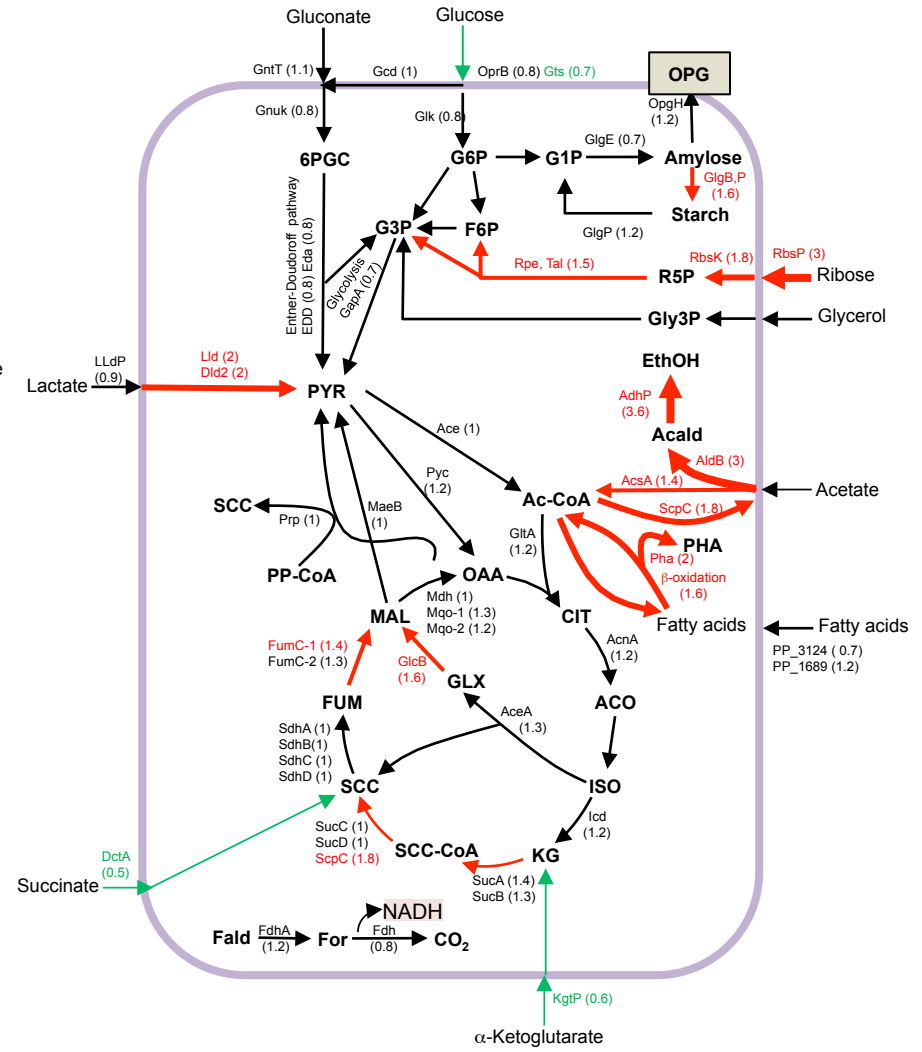

Central carbon metabolism, Crc-null strain, late phase vs. mid phase

Supplement: EMI-21-4446-s009.pdf [file EMI-21-4446-s009.pdf]

## A. Flux model

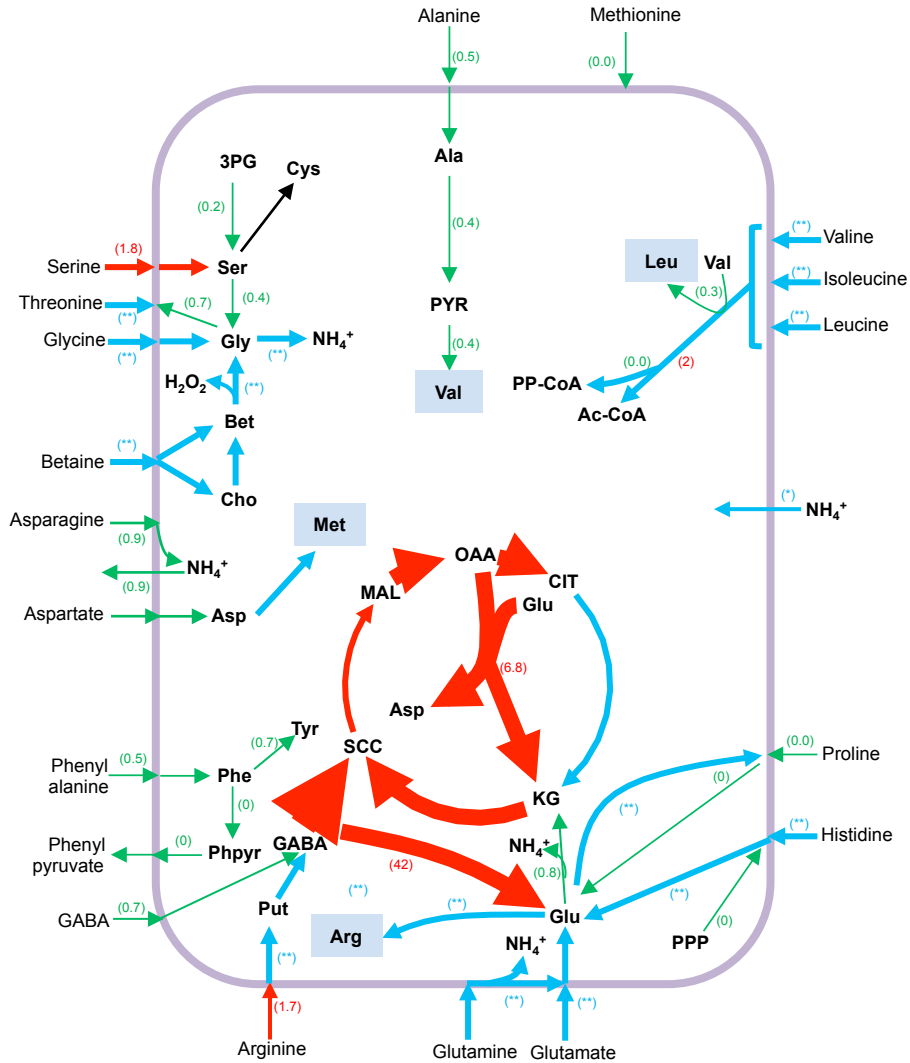

## B. Proteomics

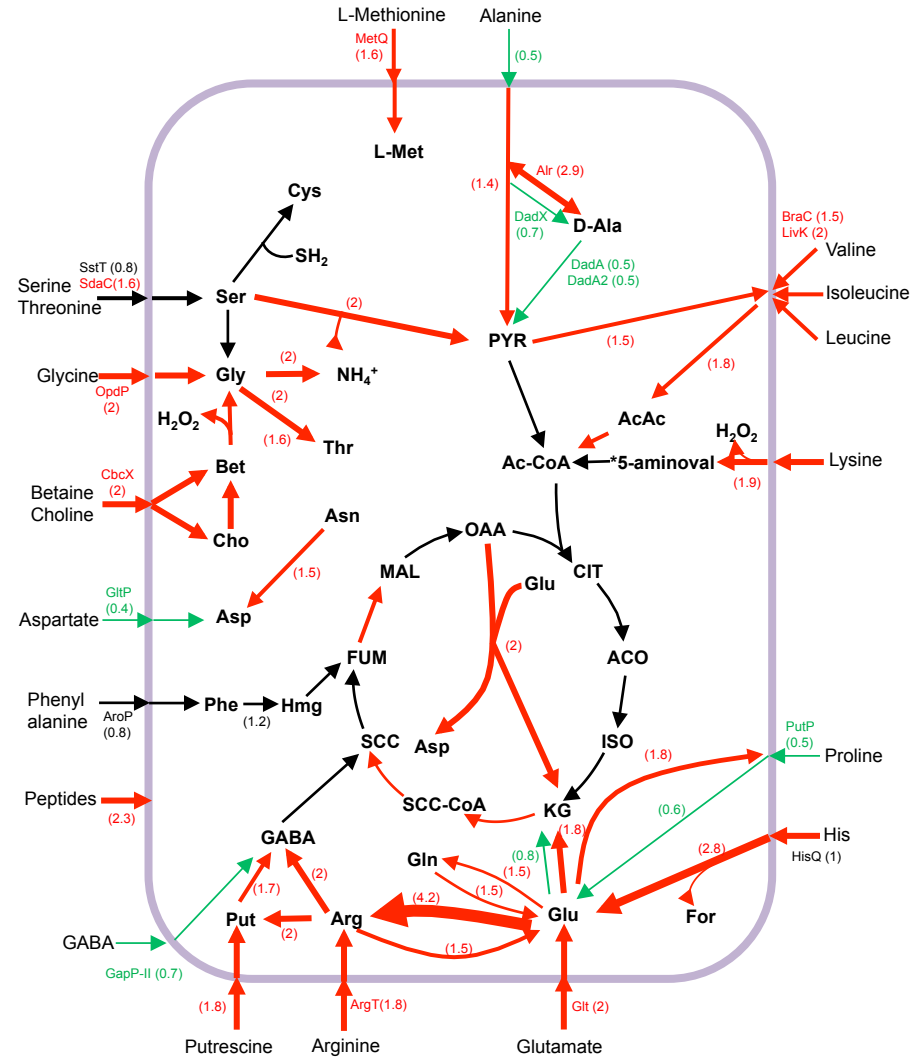

Metabolism of amino acids, Crc-null strain, late phase vs. mid phase

Supplement: EMI-21-4446-s010.pdf [file EMI-21-4446-s010.pdf]

## A. Flux model

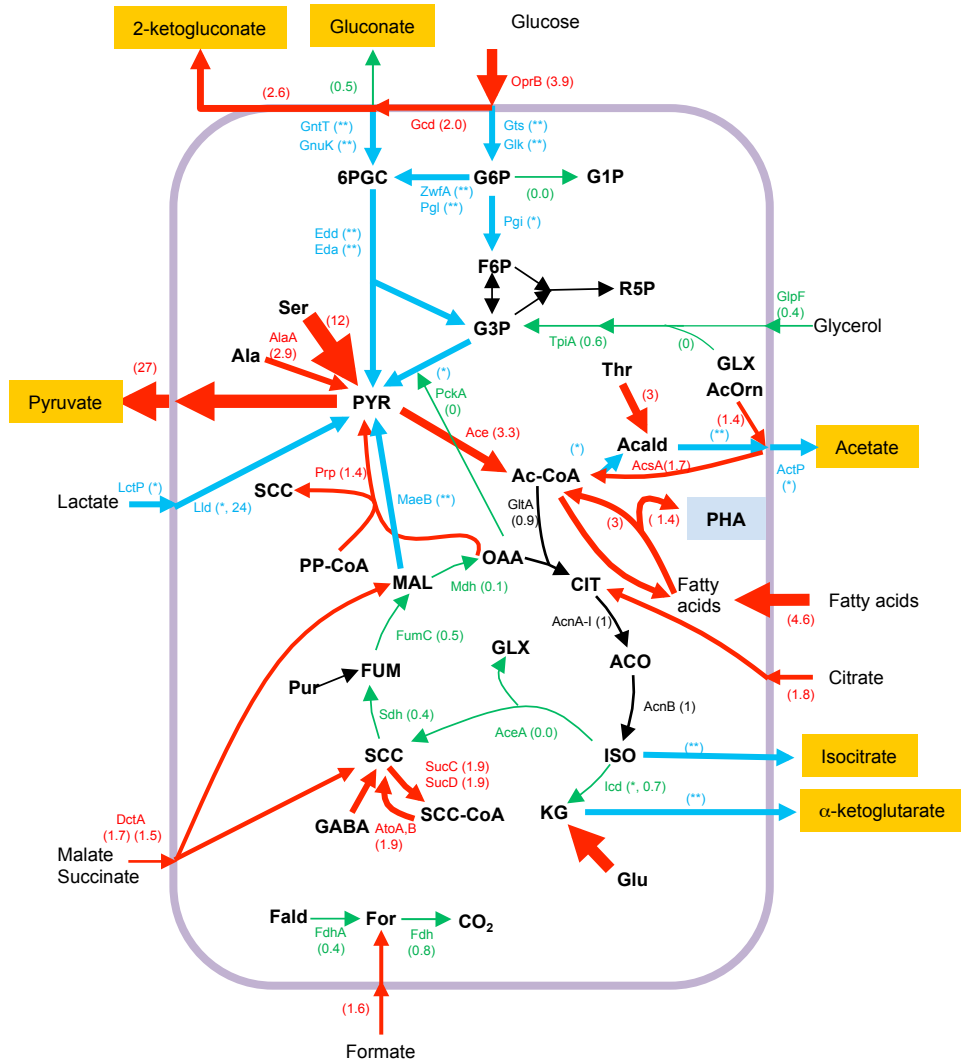

## B. Proteomics

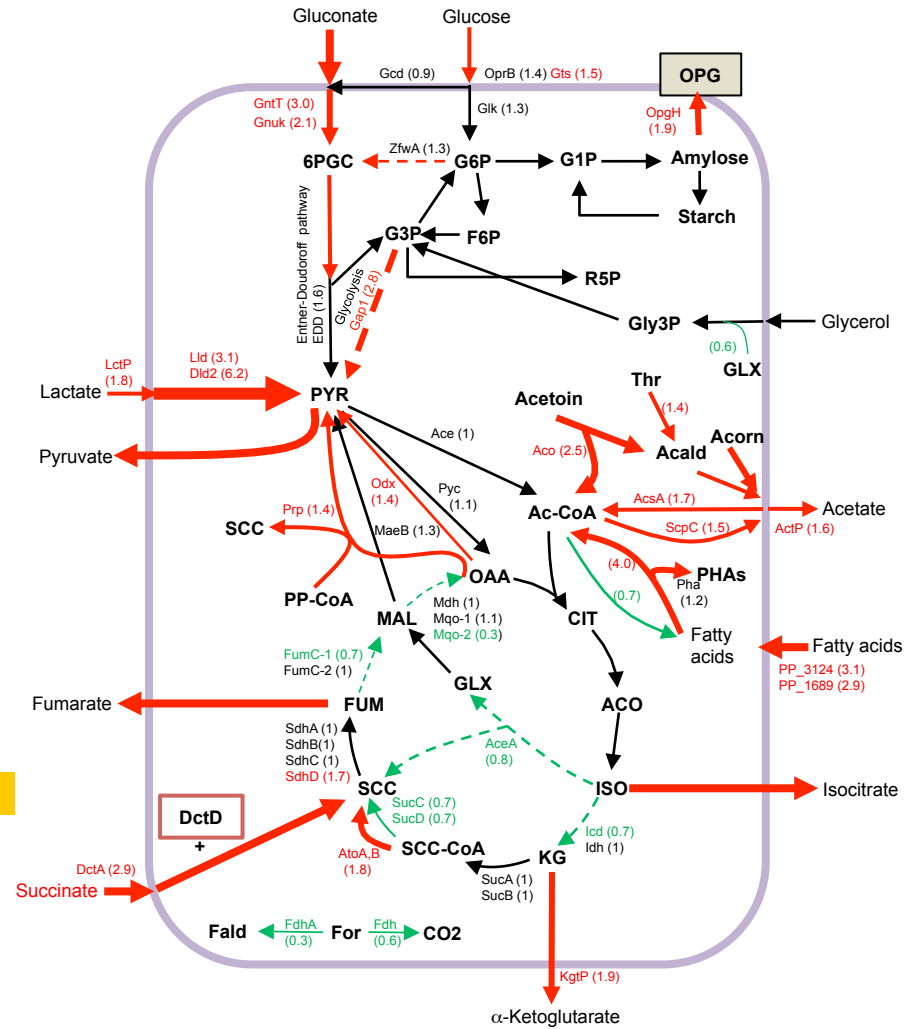

Central carbon metabolism, Crc-null vs. wild type, early phase

Supplement: EMI-21-4446-s011.pdf [file EMI-21-4446-s011.pdf]

## A. Flux model

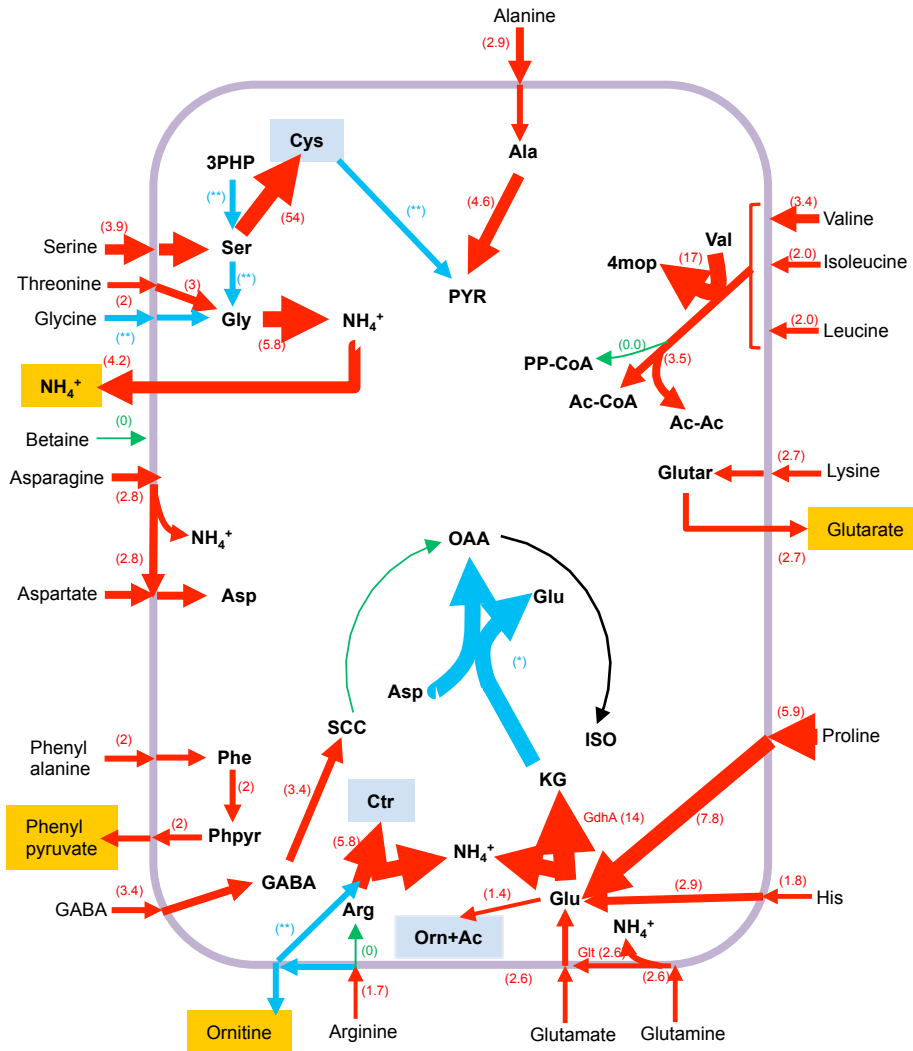

## B. Proteomics

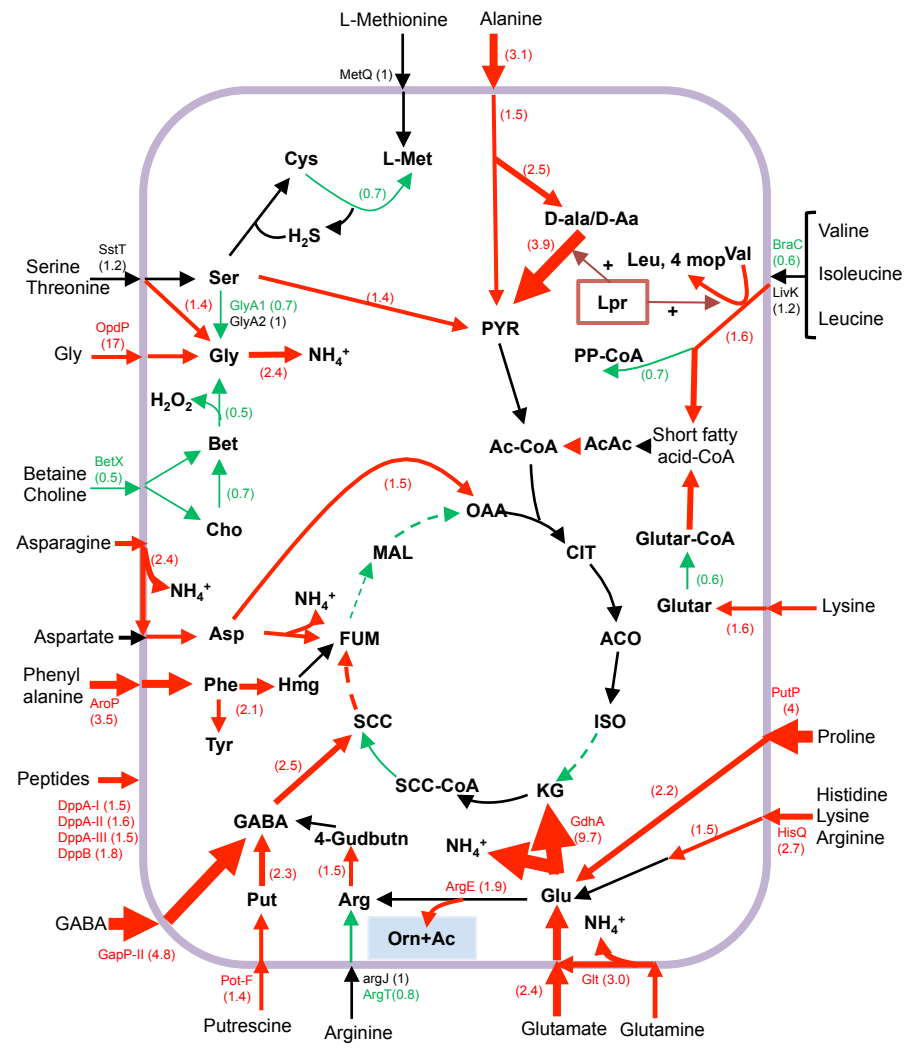

Metabolism of amino acids, Crc-null vs. wild type, early phase

Supplement: EMI-21-4446-s012.pdf [file EMI-21-4446-s012.pdf]

## A. Flux model

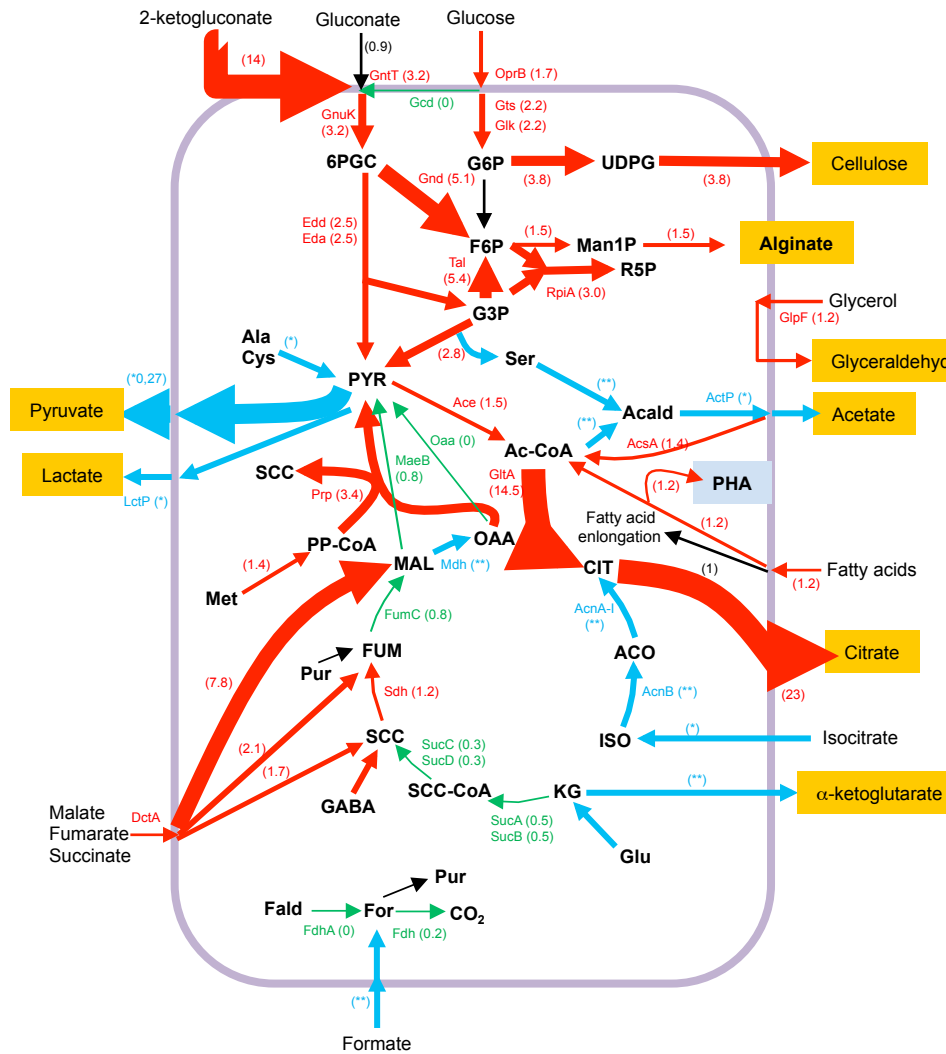

## B. Proteomics

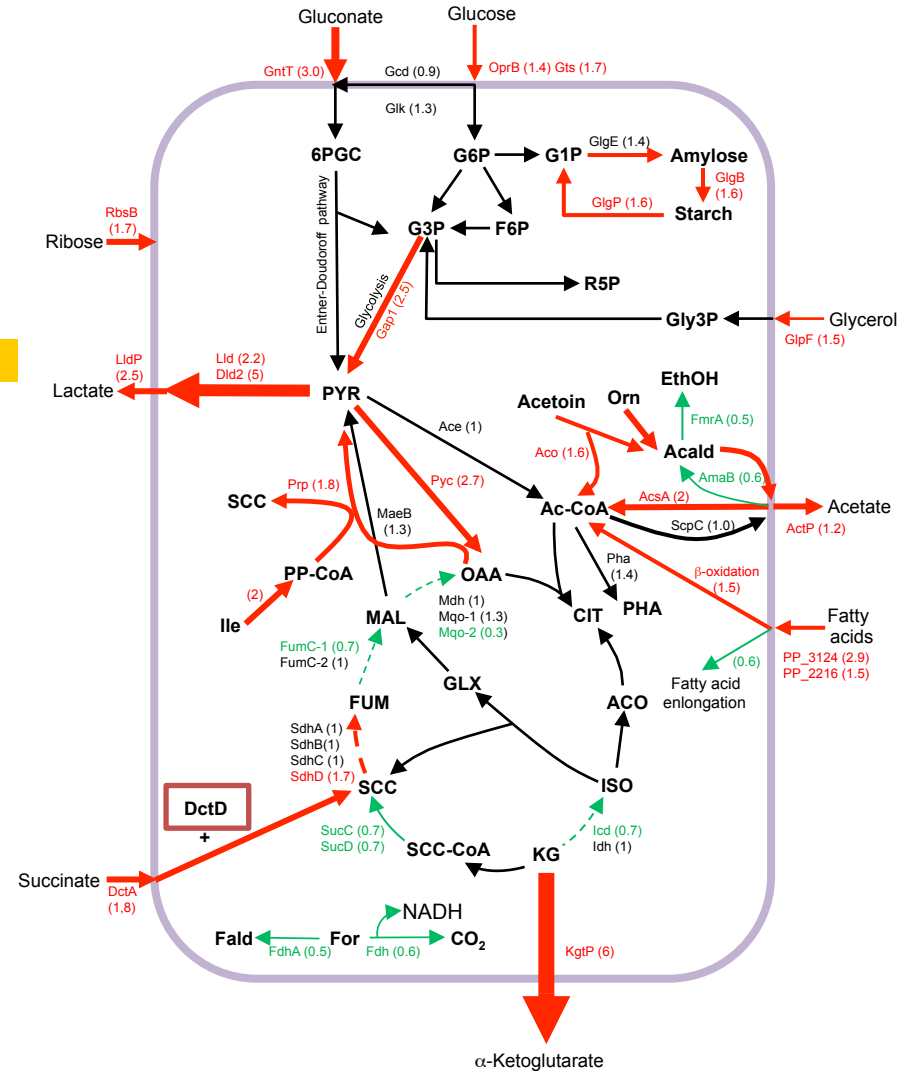

Central carbon metabolism, *Crc*-null vs. wild type, mid phase

Supplement: EMI-21-4446-s013.pdf [file EMI-21-4446-s013.pdf]

## A. Flux model

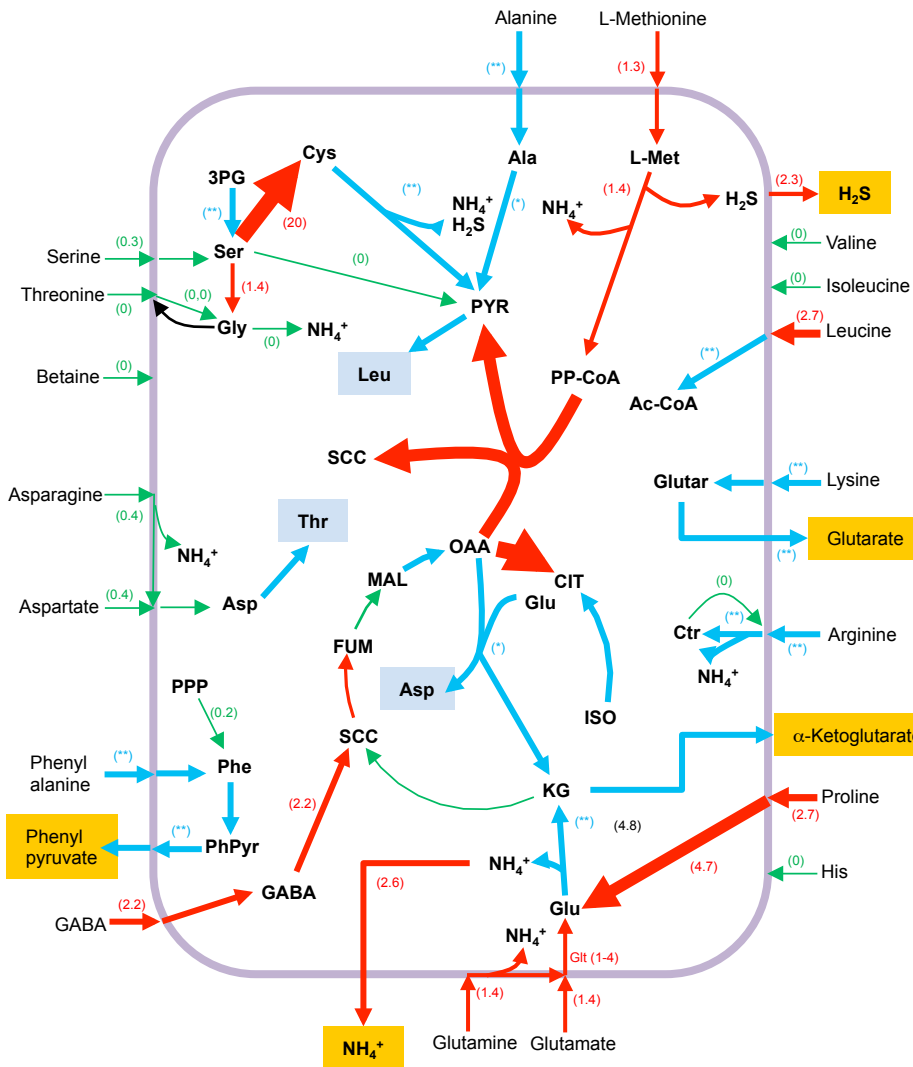

## B. Proteomics

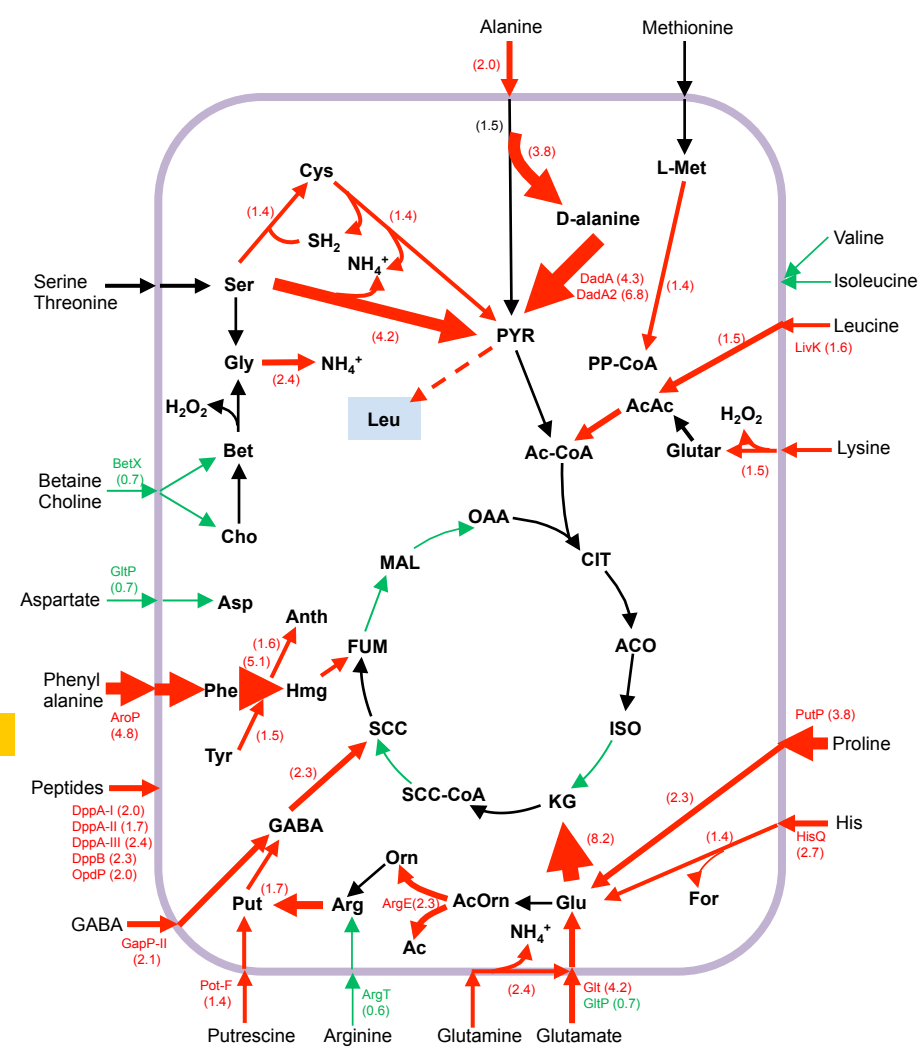

Metabolism of amino acids, *Crc*-null vs. wild type, mid phase

Supplement: EMI-21-4446-s014.pdf [file EMI-21-4446-s014.pdf]

## A. Flux model

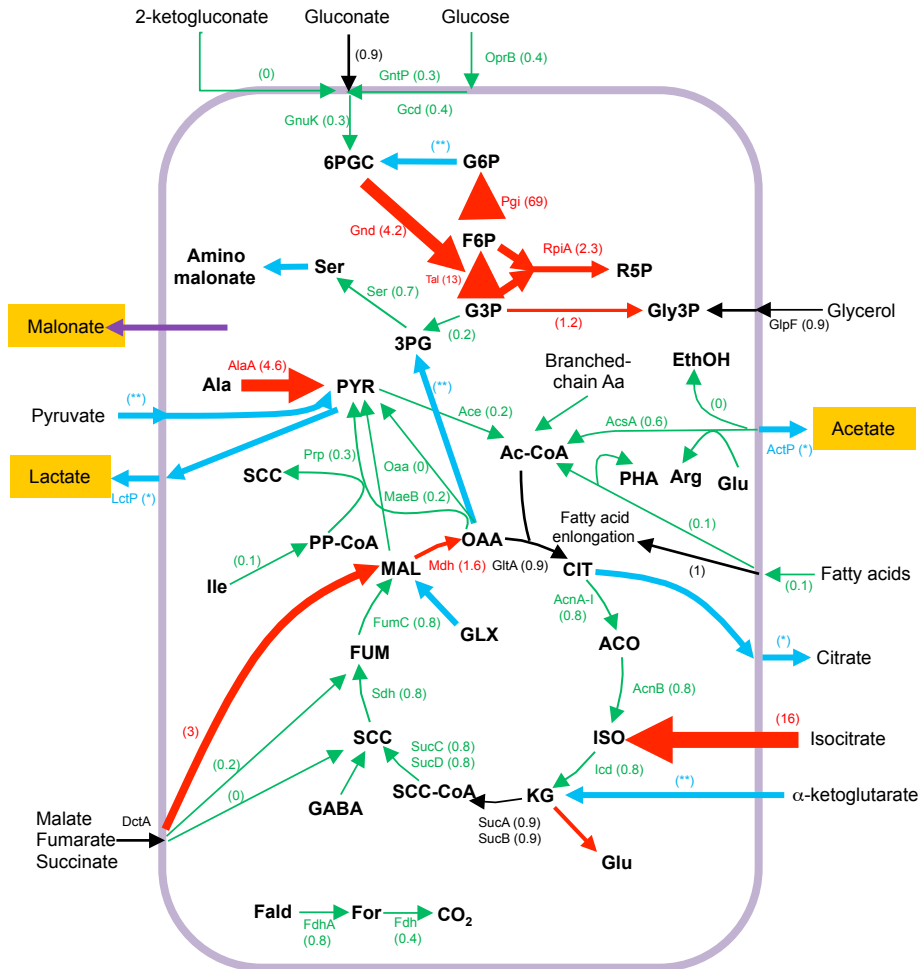

## B. Proteomics

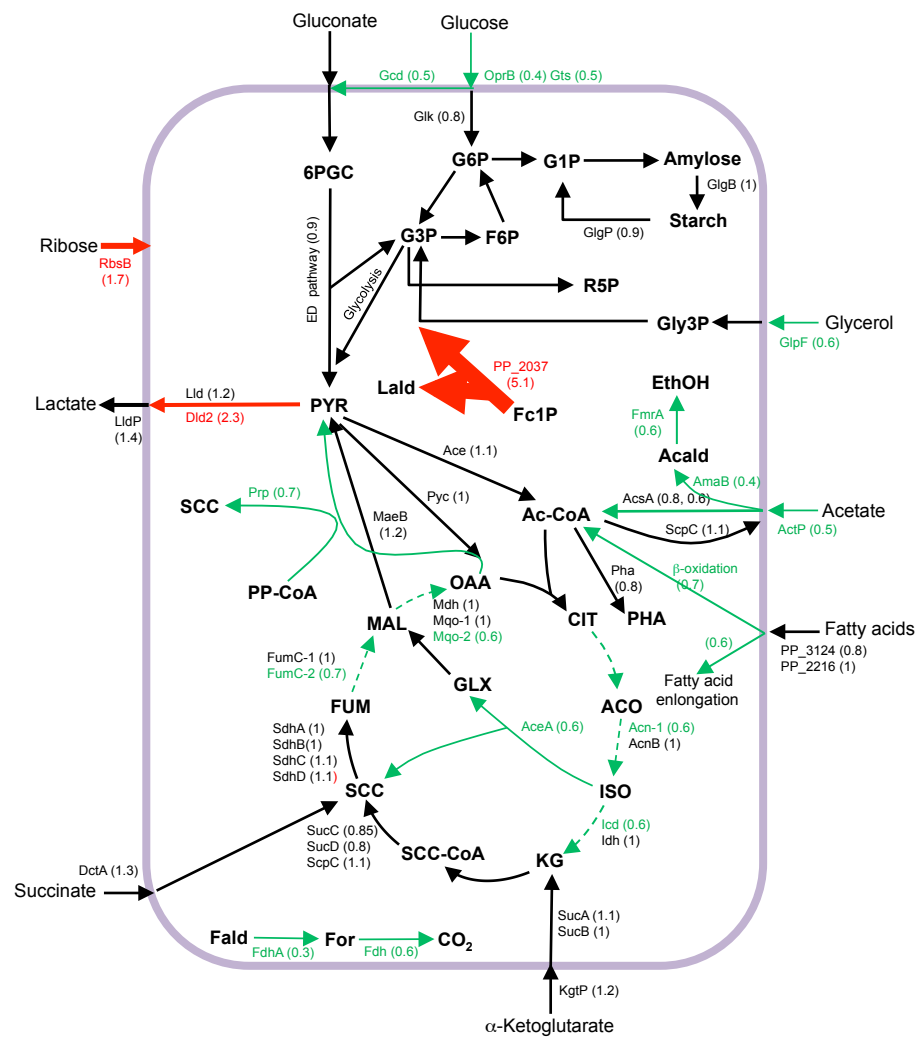

Central carbon metabolism, Crc-null vs. wild type, late phase

Supplement: EMI-21-4446-s015.pdf [file EMI-21-4446-s015.pdf]

## A. Flux model

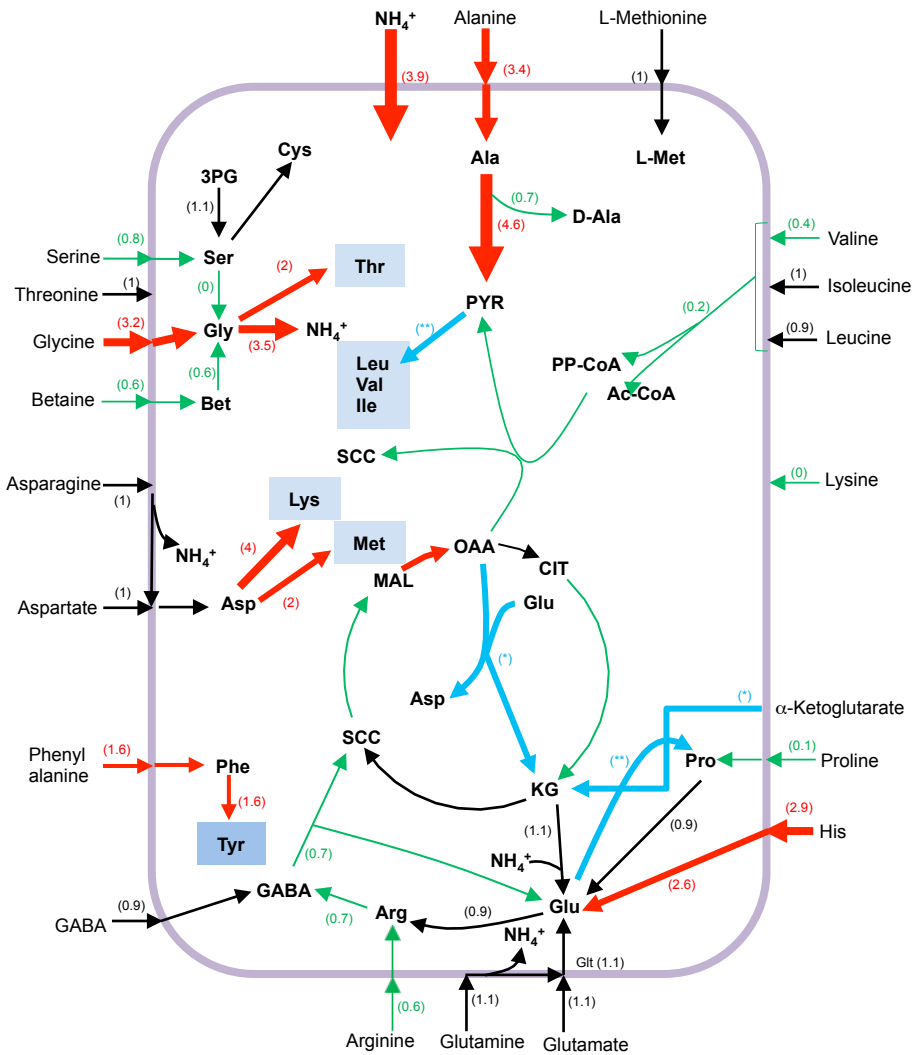

## B. Proteomics

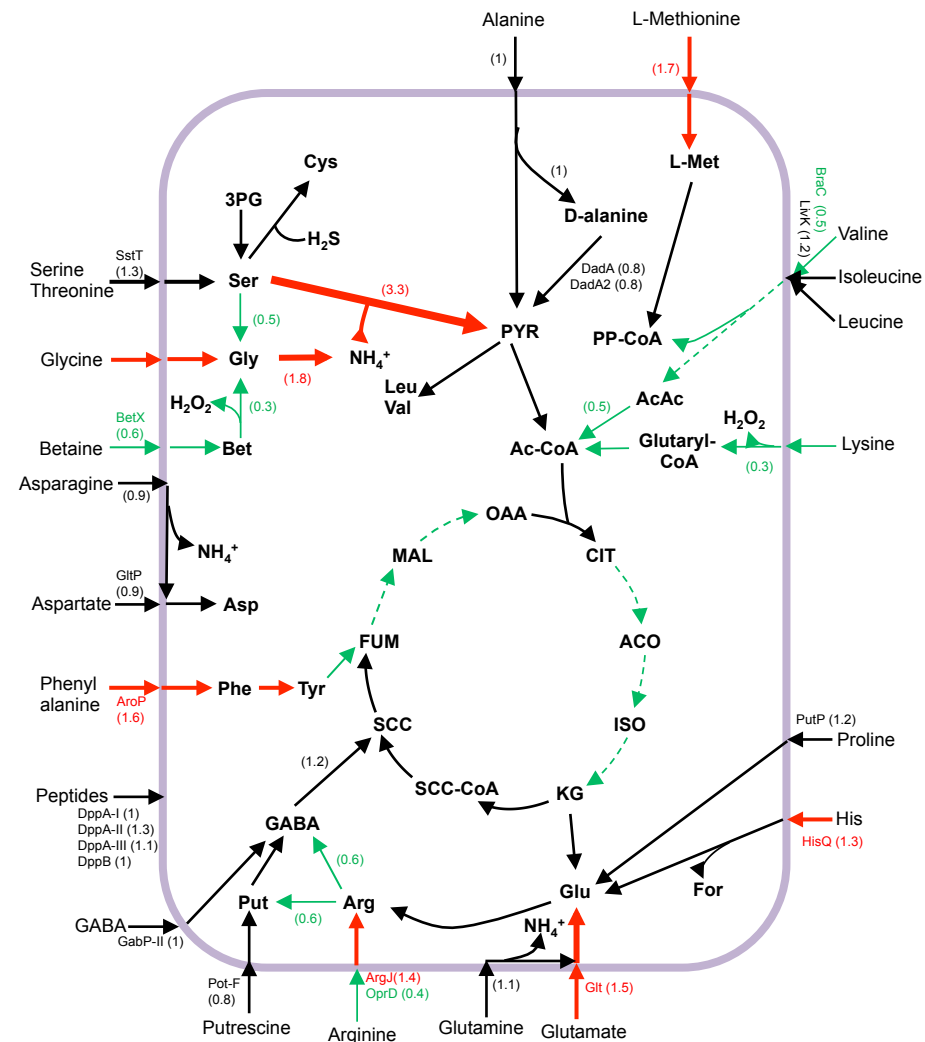

Metabolism of amino acids, Crc-null vs. wild type, late phase

Supplement: EMI-21-4446-s016.pdf [file EMI-21-4446-s016.pdf]
